# Supplementary material
Source: HighWire-hosted journal article supplement (https://bjsm.bmj.com/content/54/5/292)
Supplement: inline-supplementary-material-1 [file inline-supplementary-material-1.docx]

| **The ESpA-study: screening of cardiovascular diseases** |
| --- |
| 1. **Patients with cerebral stroke, established coronary heart disease (prior myocardial infarction or angina pectoris) and or an indication of ischemic heart disease will be excluded from the ESpA-study.** |
| 1. **Screening questions at baseline:**  - Relatives who have died suddenly and unexpected before the age of 40 years. - Indication of ischemic heart disease during physical activity such as chest pain, dizziness or abnormal dyspnea - First-degree relatives diagnosed with hypertrophic cardiomyopathy - ECG signs of ischemic heart disease shown at a previous consultation |
| 1. **Blood pressure (measured at baseline)**   Systolic blood pressure > 200 mmHg or diastolic blood pressure > 115 is a contraindication for physical activity, and participants are excluded from the study. |
| 1. **Atrial fibrillation (measured at baseline)**   If atrial fibrillation is detected at baseline the patients is excluded from the ESpA-study. |
